# Supplementary material for: Can the Results of Biodiversity-Ecosystem Productivity Studies Be Translated to Bioenergy Production?
Source: PLoS One. 2015 Sep 11;10(9):e0135253. doi: 10.1371/journal.pone.0135253 (PMC4567130; doi:10.1371/journal.pone.0135253)
Supplement: S2 Table — Species used in the Cedar Creek [12] and our LTER experiment, and the seed density planted for each species. We also estimate how much seed would have cost in our LTER experiment if we would have used the same seed densities as the following experiments: [12,32,33]. (XLSX) [file pone.0135253.s003.xlsx]

## Sheet: Seed density and cost
A list of all species used in our LTER experiment and Tilman et al. (2006), the density per species for the different species richness treatments in our LTER experiment (KBS LTER experiment), and the cost of seed for densities used in our LTER experiment, Tilman et al. (2006), Hector et al. (1999), and Roscher et al. (2004). Previous Latin names are those used in Tilman et al. (2006) that now hav…																		2013 October								2015 May
																		Price per pound of seed at various seed retail websites, as listed in 2013 October								Price per pound of seed at various seed retail websites (the 2015 May data is added to show how prices can change through time)
Latin name	common name	Previous Latin name	Used in Tilman et al. (2006; 100 kg ha-1 total weight)	Used in KBS LTER experiment	KBS 1 sp. (shown as kg ha-1 per species)	KBS 2 sp.	KBS 6 sp.	KBS 10 sp.	KBS 18 sp.	KBS 30 sp.	price per hectare for seed density used in KBS LTER experiment (30 sp. planting)	price per hectare for same seed density as Tilman et al. (2006; 100 kg ha-1)	price per hectare for same seed density as BIODEPTH (2000 seeds m2)	price per hectare for same seed density as Jena (1387 seeds m2)	Seeds per ounce as reported by Prairie Moon Nursery website	Multiply kg ha-1 by this number to determine the number of seeds per square meter	Multiply kg ha-1 by this number to determine the number of seeds per square foot	Prairie Restorations, Inc. (MN, USA) price per pound	Prairie Moon Nursery (MN, USA) price per pound	Ever Wilde (WI, USA) price per pound	Lowest price per pound	Notes				Prairie Restorations, Inc. (MN, USA) price per pound	Prairie Moon Nursery (MN, USA) price per pound	Everwilde Farms (WI, USA) price per pound	Lowest price per pound
Amorpha canescens	leadplant		*	*						0.144228	35.6125	823.058	291.667	202.271	16000	56.4383	5.24329	112	225	153.6	112	Many of the seed weights are listed in pounds or ounces on the retail seed websites, and so we have listed these units but converted to metric units when calculating cost in kg ha-1				128	225	153.6	128
Andropogon gerardii	big bluestem		*	*			1.15383	1.15383	0.86537	0.576913	15.2625	88.1848	50	34.675	10000	35.274	3.27706	15	18	12	12	For price per hectare for the same seed density as the KBS LTER experiment, we first converted the lowest price per pound of the seed to price per kg (multiply by 2.20462) and then multiplied by the number of kg of the species added per hectare in the 30 species mix.				8	12	12	8
Anemone canadensis	Canada anemone			*					0.259611	0.144228	16.0256	370.376	262.5	182.044	8000	28.2192	2.62165		600	50.4	50.4	For price per hectare for the same seed density as Tilman et al. (2006; 100 kg ha-1), we performed the calculation by first determining how much the seed would cost in monoculture at 100 kg ha-1 and then dividing this number by 30 because the total seed weight would be split equally between 30 species.					600	576	576
Asclepias syriaca	common milkweed			*						0.144228	34.3406	793.663	1125	780.188	4000	14.1096	1.31082	192	120	108	108	For price per hectare for the same seed density as BIODEPTH (2000 seeds m-2), we performed the calculation by first determining the number of seeds per species (2000/30) per m2, then dividing by the number of seeds per ounce of each species, then dividing by 16 to convert ounces to pounds, then multiplying by the cost of seed per pound, then multiplying by 10,000 m2 (100m x 100m) to finally calcu…				128	180	120	120
Asclepias tuberosa	butterfly weed		*	*					0.259611	0.144228	111.607	2579.41	3401.16	2358.71	4300	15.1678	1.40914	1440	450	351	351	For price per hectare for the same seed density as Jena (1387 seeds m2), we performed the calculation by first determining the number of seeds per species (1387/30) per m2, then dividing by the number of seeds per ounce of each species, then dividing by 16 to convert ounces to pounds, then multiplying by the cost of seed per pound, then multiplying by 10,000 m2 (100m x 100m) to finally calculate …				720	450	390	390
Baptisia alba	white wild indigo	Baptisia leucantha		*					0.259611	0.144228	57.2344	1322.77	4411.76	3059.56	1700	5.99657	0.5571		180	256	180	For the conversion between kg per hectare to number of seed per square meter, 0.00352739619 converts 1 kg per hectare to ounces per square meter. Multiplying this number by the number of seeds per ounce produces a number that can be multiplied by the kg per hectare of seeds to give the number of seeds per square meter. For the conversion between kg per hectare to number of seed per square foot, 0…					150	256	150
Coreopsis tripteris	tall coreopsis			*						0.144228	95.3906	2204.62	892.857	619.196	14000	49.3835	4.58788	300	582.4		300							390	390
Dalea purpurea	purple prairie clover	Petalostemum purpureum	*	*						0.144228	11.4469	264.554	100	69.35	15000	52.9109	4.91559	80	45	36	36					80	45	36	36
Desmodium canadense	showy tick trefoil			*				0.374994	0.259611	0.144228	50.875	1175.8	1212.12	840.606	5500	19.4007	1.80238	160	300	256	160					288	180	256	180
Desmodium illinoense	Illinois tick trefoil			*						0.144228	71.543	1653.46	2180.23	1511.99	4300	15.1678	1.40914		225	512	225							320	320
Elymus canadensis	Canada wild rye		*	*		3.46148	1.61536	1.15383	0.86537	0.576913	15.2625	88.1848	96.1538	66.6827	5200	18.3425	1.70407	20	15	12	12					20	15	12	12
Euphorbia corollata	flowering spurge			*						0.144228	284.9	6584.47	4666.67	3236.33	8000	28.2192	2.62165		900	896	896						960	1843.2	960
Koeleria cristata	Junegrass		*	*			0.576913	0.576913	0.576913	0.432685	71.543	551.155	15.625	10.8359	200000	705.479	65.5412	75	180	281.6	75					75	180	281.6	75
Lespedeza capitata	round-headed bushclover		*	*					0.259611	0.144228	50.875	1175.8	833.333	577.917	8000	28.2192	2.62165	160	300	320	160					160	180	320	160
Monarda fistulosa	wild bergamot		*	*				0.374994	0.259611	0.144228	61.05	1410.96	114.286	79.2571	70000	246.918	22.9394	240	225	192	192					200	225	192	192
Oenothera biennis	common evening primrose			*						0.144228	28.6172	661.386	41.6667	28.8958	90000	317.466	29.4935		90	115.2	90						90	60	60
Oligoneuron rigidum	stiff goldenrod	Solidago rigida		*				0.374994	0.259611	0.144228	20.35	470.319	65.0407	45.1057	41000	144.623	13.4359	64	90	86.4	64					96	120	128	96
Panicum virgatum	switch grass		*	*	16.1536	4.61531	1.44228	0.576913	0.576913	0.576913	14.652	84.6574	34.2857	23.7771	14000	49.3835	4.58788	25	24	11.52	11.52					14	15	11.52	11.52
Ratibida pinnata	yellow coneflower			*					0.259611	0.144228	15.2625	352.739	66.6667	46.2333	30000	105.822	9.83117	160	60	48	48					320	75	48	48
Rudbeckia hirta	black-eyed Susan			*				0.374994	0.259611	0.230765	13.431	194.007	11.9565	8.29185	92000	324.52	30.1489	144	45	26.4	26.4					160	45	26.4	26.4
Schizachyrium scoparium	little bluestem		*	*			2.0192	1.44228	0.86537	0.86537	31.1355	119.931	45.3333	31.4387	15000	52.9109	4.91559	18	22	16.32	16.32					24	22	16.32	16.32
Silphium perfoliatum	cup plant			*					0.259611	0.144228	38.1562	881.848	3571.43	2476.79	1400	4.93835	0.458788		120	192	120						120	192	120
Solidago nemoralis	gray goldenrod			*						0.144228	101.75	2351.59	44.4444	30.8222	300000	1058.22	98.3117	480	450	320	320					640	300	320	300
Solidago speciosa	showy goldenrod			*					0.259611	0.144228	71.543	1653.46	98.6842	68.4375	95000	335.103	31.1321		225	384	225						225	537.6	225
Sorghastrum nutans	Indiangrass		*	*			1.09614	1.15383	0.86537	0.576913	19.0781	110.231	52.0833	36.1198	12000	42.3288	3.93247	16	15	76.8	15					12	18	24	12
Symphyotrichum laeve	smooth blue aster	Aster laevis		*						0.144228	61.05	1410.96	145.455	100.873	55000	194.007	18.0238	320	300	192	192					480	225	192	192
Symphyotrichum novae-angliae	New England aster	Aster novae-angliae		*					0.259611	0.144228	83.9437	1940.07	166.667	115.583	66000	232.808	21.6286	480	375	264	264						300	264	264
Symphyotrichum pilosum	hairy aster	Aster pilosus		*						0.144228	203.5	4703.19	190.476	132.095	140000	493.835	45.8788		640		640						480		480
Tradescantia ohiensis	Ohio spiderwort			*						0.144228	51.5109	1190.49	843.75	585.141	8000	28.2192	2.62165		225	162	162						225	180	180
Zizia aurea	golden Alexanders			*						0.144228	28.6172	661.386	340.909	236.42	11000	38.8014	3.60476	192	90	128	90					240	90	128	90
Achillea millefolium	yarrow		*															272		54	54					80		57.6	57.6
Liatris aspera	tall blazing star		*																450	480	450					720	300	42	42
Lupinus perennis	wild lupine		*															240	240	384	240					160	300	384	160
Pascopyrum smithii	western wheatgrass		*																8		8						12		12
Poa pratensis	Kentucky bluegrass		*																		2.19	Cost of $2.19 per pound at Deer Creek Seed, Inc., Ashland, WI, USA							2.35
Quercus ellipsoidalis	northern pin oak		*																			This species is not generally for sale from seed companies, but it would likely have a much higher seed cost than other species.
Quercus macrocarpa	bur oak		*																			This species is not generally for sale from seed companies, but it would likely have a much higher seed cost than other species.
